# Supplementary material for: Corrigendum to “XRRA1 Targets ATM/CHK1/2‐Mediated DNA Repair in Colorectal Cancer”
Source: Hindawi journal article supplement (doi:10.1155/2021/3030267), 2021-01-01
Supplement: f1 [file 3030267.f1.pdf]

客户姓名: 王文君 广州医科大学

订单号: SY0110915

订购日期: 2015-12-5

-1-

| 流水号       | 引物名称              | 引物序列(5-3)               | 碱基数 | 总OD | OD/管 | 分装管数 | 纯化方式 | MW      | T <sub>m</sub> /0.05M (°C) | GC%   | nmol/0 D | nmol/tube | ug/tube | Add 100µl/管 for 100µM (G1) |
|-----------|-------------------|-------------------------|-----|-----|------|------|------|---------|----------------------------|-------|----------|-----------|---------|----------------------------|
| 011180280 | XRRAl forward①    | TCAGGAATCTACAAGCTGCATGA | 23  | 2   | 2    | 1    | PAGE | 7096.64 | 56.21                      | 43.00 | 3.75     | 7.50      | 53.24   | 75.02                      |
| 011180281 | XRRAl reverse①    | CTGAAACCAGTAAACCAGTGTCC | 21  | 2   | 2    | 1    | PAGE | 6335.24 | 57.59                      | 52.00 | 4.52     | 9.05      | 57.31   | 90.46                      |
| 011180282 | XRRAl forward②    | CTGGGGGGGAAATCAGGT      | 19  | 2   | 2    | 1    | PAGE | 5877.84 | 57.09                      | 58.00 | 4.66     | 9.32      | 54.81   | 93.24                      |
| 011180283 | XRRAl reverse②    | TGGAACGTGTGAATGCCTC     | 21  | 2   | 2    | 1    | PAGE | 6470.24 | 55.63                      | 48.00 | 4.24     | 8.48      | 54.88   | 84.82                      |
| 011180284 | XRRAl forward③    | CTGATCTCGCATTTAATGGCA   | 22  | 2   | 2    | 1    | PAGE | 6725.44 | 55.94                      | 45.00 | 4.28     | 8.56      | 57.58   | 85.62                      |
| 011180285 | XRRAl reverse③    | TTGCTTGTCAAGCATTTACA    | 21  | 2   | 2    | 1    | PAGE | 6427.24 | 53.68                      | 43.00 | 4.55     | 9.10      | 58.51   | 91.03                      |
| 011180286 | XRRAl forward④    | AACTCAACAAGAAGCC        | 18  | 2   | 2    | 1    | PAGE | 5470.64 | 52.24                      | 50.00 | 4.74     | 9.48      | 51.88   | 94.83                      |
| 011180287 | XRRAl reverse④    | AACTCAAAAAGAAGTCC       | 18  | 2   | 2    | 1    | PAGE | 5485.64 | 49.97                      | 44.00 | 4.71     | 9.42      | 51.65   | 94.16                      |
| 011180288 | XRRAl forward⑤    | ACTGCCTCCCATCTGCTC      | 18  | 2   | 2    | 1    | PAGE | 5346.64 | 56.80                      | 61.00 | 6.10     | 12.20     | 65.24   | 122.03                     |
| 011180289 | XRRAl reverse⑤    | CCGTTGGTGGTTTCTTTT      | 18  | 2   | 2    | 1    | PAGE | 5493.64 | 49.97                      | 44.00 | 5.94     | 11.88     | 65.25   | 118.76                     |
| 011180290 | Cyclin E forward① | AAGGACGGGGACACCATGA     | 19  | 2   | 2    | 1    | PAGE | 5895.84 | 57.09                      | 58.00 | 4.39     | 8.78      | 51.79   | 87.83                      |

感谢您选择天一为您提供合成服务, 请您在使用前参考背面的相关说明!

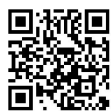

| 流水号       | 引物名称                | 引物序列(5-3)              | 碱基数 | 总OD | ω/管 | 分装管数 | 纯化方式 | MW      | T <sub>m</sub> /0.05M (°C) | GC%   | nmol/0 D | nmol/tube | ug/tube | Add (μg/100μl) |
|-----------|---------------------|------------------------|-----|-----|-----|------|------|---------|----------------------------|-------|----------|-----------|---------|----------------|
| 011180291 | Cyclin E reverse ①  | AAGGTGACGTTTGCTTCC     | 19  | 2   | 2   | 1    | PAGE | 5730.84 | 57.09                      | 58.00 | 5.51     | 11.02     | 63.15   | 110.19         |
| 011180292 | Cyclin E forward ②  | GCCAGCCTTGGACAATAATG   | 21  | 2   | 2   | 1    | PAGE | 6455.24 | 57.59                      | 52.00 | 4.27     | 8.54      | 55.10   | 85.36          |
| 011180293 | Cyclin E reverse ②  | CTTGACAGTTGAGTTGGGT    | 20  | 2   | 2   | 1    | PAGE | 6170.04 | 55.30                      | 50.00 | 4.88     | 9.76      | 60.20   | 97.56          |
| 011180294 | Cyclin A2 forward ① | CGCTGGCGGTACTGAAGTC    | 19  | 2   | 2   | 1    | PAGE | 5844.84 | 59.25                      | 63.00 | 5.01     | 10.01     | 58.51   | 100.10         |
| 011180295 | Cyclin A2 reverse ① | GAGGAACGGTGACATGCTCAT  | 21  | 2   | 2   | 1    | PAGE | 6495.24 | 57.59                      | 52.00 | 4.19     | 8.38      | 54.42   | 83.79          |
| 011180296 | Cyclin A2 forward ② | TGGAACCAACAGTAAACAGCC  | 23  | 2   | 2   | 1    | PAGE | 7083.64 | 56.21                      | 43.00 | 3.55     | 7.09      | 50.24   | 70.92          |
| 011180297 | Cyclin A2 reverse ② | GGGCATCTTCAAGCTTAATTT  | 21  | 2   | 2   | 1    | PAGE | 6363.24 | 55.63                      | 48.00 | 4.83     | 9.65      | 61.42   | 96.53          |
| 011180298 | P21 forward ①       | TGTCCCTCAGAACCCATGC    | 19  | 2   | 2   | 1    | PAGE | 5748.84 | 57.09                      | 58.00 | 5.14     | 10.27     | 59.05   | 102.72         |
| 011180299 | P21 reverse ①       | AAAGTGAAGTTCATCGCTC    | 21  | 2   | 2   | 1    | PAGE | 6390.24 | 55.63                      | 48.00 | 4.41     | 8.81      | 56.30   | 88.11          |
| 011180300 | P21 forward ②       | CGATGGAAGTTCGACTTGTCA  | 22  | 2   | 2   | 1    | PAGE | 6725.44 | 55.94                      | 45.00 | 4.28     | 8.56      | 57.58   | 85.62          |
| 011180301 | P21 reverse ②       | GCACAAGGTTACAAGACAGTGC | 21  | 2   | 2   | 1    | PAGE | 6513.24 | 57.59                      | 52.00 | 3.97     | 7.94      | 51.71   | 79.40          |

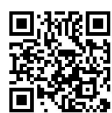

扫描全能王 创建

| 流水号       | 引物名称           | 引物序列(5-3)              | 碱基<br>数 | 总OD | 00/管 | 分装<br>管数 | 纯化<br>方式 | MW      | Tm/0.05M<br>(°C) | GC%   | nmol/O<br>D | nmol/tube | ug/tube | Add H <sub>2</sub> O Volume<br>for 100uM(ul) |
|-----------|----------------|------------------------|---------|-----|------|----------|----------|---------|------------------|-------|-------------|-----------|---------|----------------------------------------------|
| 011180302 | P21 forward③   | TGGGGATGTCCGTCAGAA     | 18      | 2   | 2    | 1        | PAGE     | 5579.64 | 54.52            | 56.00 | 4.99        | 9.97      | 55.63   | 99.70                                        |
| 011180303 | P21 reverse③   | CCCGTGGGAAGGTAGAGC     | 18      | 2   | 2    | 1        | PAGE     | 5589.64 | 59.08            | 67.00 | 4.95        | 9.90      | 55.34   | 99.01                                        |
| 011180304 | GAPDH forward① | GGAGCGAGATCCCTCCAAAAT  | 21      | 2   | 2    | 1        | PAGE     | 6424.24 | 57.59            | 52.00 | 4.23        | 8.46      | 54.33   | 84.57                                        |
| 011180305 | GAPDH reverse① | GGCTGTTGCATACTTCTCATGG | 23      | 2   | 2    | 1        | PAGE     | 7036.64 | 58.00            | 48.00 | 4.31        | 8.62      | 60.63   | 86.17                                        |
| 011180306 | GAPDH forward② | ACAAC TTTGGTATCGTGAAGG | 22      | 2   | 2    | 1        | PAGE     | 6814.44 | 55.94            | 45.00 | 4.02        | 8.03      | 54.73   | 80.32                                        |
| 011180307 | GAPDH reverse② | GCCATCAGCCACAGTTTC     | 19      | 2   | 2    | 1        | PAGE     | 5708.84 | 57.09            | 58.00 | 5.25        | 10.51     | 60.00   | 105.10                                       |
|           |                |                        |         |     |      |          |          |         |                  |       |             |           |         |                                              |
|           |                |                        |         |     |      |          |          |         |                  |       |             |           |         |                                              |
|           |                |                        |         |     |      |          |          |         |                  |       |             |           |         |                                              |
|           |                |                        |         |     |      |          |          |         |                  |       |             |           |         |                                              |
|           |                |                        |         |     |      |          |          |         |                  |       |             |           |         |                                              |
|           |                |                        |         |     |      |          |          |         |                  |       |             |           |         |                                              |

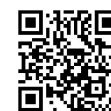

扫描全能王 创建
